*Psychiatric Services* is a monthly interdisciplinary journal published by the American Psychiatric Association.

**Editor**

Howard H. Goldman, M.D., Ph.D.

**Managing Editor**

Constance Grant Gartner

**Mailing Address**

*Psychiatric Services*  
American Psychiatric Association  
1000 Wilson Boulevard  
Suite 1825  
Arlington, VA 22209-3901

**Editorial Office**

Phone: 703-907-7885  
Fax: 703-907-1095  
E-mail: psjournal@psych.org

**APA Publication Services**

Phone: 703-907-7331  
Fax: 703-907-1093

**Director**

Nancy Frey  
E-mail: nfrey@psych.org

**Associate Director**

Laura Abedi  
E-mail: labedi@psych.org

**Advertising Sales**

**Pharmaceutical Print Advertising**

Valentin Torres  
Pharmaceutical Media, Inc.  
Phone: 212-685-5010  
E-mail: vtorres@pminy.com

**Nonpharmaceutical and  
Online Advertising**

Brian Skepton  
Phone: 703-907-7332  
E-mail: bskepton@psych.org

**Subscriptions/Customer Service**

Phone: 800-368-5777, 703-907-7322  
Fax: 703-907-1091  
E-mail: appi@psych.org

**Sales and Marketing**

Phone: 703-907-8538  
Fax: 703-907-1092

**Associate Publisher**

Robert S. Pursell  
E-mail: bpursell@psych.org

**Institutional Sales Manager**

Trang Smith  
E-mail: tsmith@psych.org

**Print Subscriptions**

For U.S. and Canadian members of the American Psychiatric Association, a one-year subscription (12 issues) is \$84. For international members, the one-year rate is \$152. For nonmembers, a one-year subscription within the United States is \$112 for individuals and a subscription outside the United States is \$168 for individuals.

Institutional subscriptions are tier priced. For institutional site license information and pricing, contact us at institutions@psych.org or 800-368-5777.

Individual subscriptions can be ordered online by visiting the American Psychiatric Publishing, Inc., Web site at www.appi.org. To order by telephone, call Customer Service at 800-368-5777 or 703-907-7322. Mail subscription orders to Customer Service at the address shown on the left. Make checks payable to the American Psychiatric Association.

All subscriptions to the print journal include access to the online journal on the Internet. To activate a subscription online, visit ps.psychiatryonline.org and click "Subscriptions." Select "Activate" and follow the steps. Help is available at accessnumber@psych.org.

Subscribers also have free full-text access to the journal's Legacy Content (1950-1997).

**Online-Only Subscriptions**

APA members, including international members, can purchase an online-only subscription for \$49 per year. For other individuals the cost is \$101 per year (\$33 for students).

**Address Changes and  
Subscription Inquiries**

For address changes or inquiries about subscription status or billing, contact Customer Service. For faster service, refer to the personal I.D. number located above the name on the mailing label. For address changes, include both the old and the new address. Please give at least six weeks' notice of a change of address to ensure uninterrupted service. For address changes or inquiries about group

subscriptions, phone 800-368-5777.

Please notify Customer Service of missed issues within two months and allow two to three weeks for delivery.

**Subscriptions for Residents**

Psychiatric residents in U.S. training programs are entitled to receive a free subscription to *Psychiatric Services* throughout their residency training. Residents requesting a free subscription should send their name and address along with the name and location of their residency program, their year of training, and the name of their training director to Nancy Delanoche in the office of education at APA; phone: 703-907-8635; fax: 703-907-7849; e-mail: ndelanoche@psych.org.

**Single Issues**

Single issues from previous volumes or earlier issues in the current volume are available for purchase from Customer Service. Single issues are \$36 in the U.S. and \$49 outside the U.S.

**Permissions and Reprints**

APA grants permission to photocopy journal material in limited quantities for educational and classroom use. For larger quantities and wider use, permission is granted to libraries and other users registered with the Copyright Clearance Center (CCC) Transactional Reporting Service, if the base fee of \$15/copy is paid directly to CCC (www.copyright.com). Bulk reprints are also available. For more information on permissions and reprints, contact Cecilia Stoute at 703-907-8547; cstoute@psych.org.

**Advertising**

For advertising rates and other information, contact one of the advertising sales representatives listed in the column at left.

All ads are subject to editorial approval before publication. APA accepts no responsibility for claims made by advertisers. The acceptance of advertising does not in any way constitute APA endorsement or approval of any advertised service or product.
