May 2011

# PSYCHIATRIC SERVICES

A Journal of the  
American Psychiatric  
Association

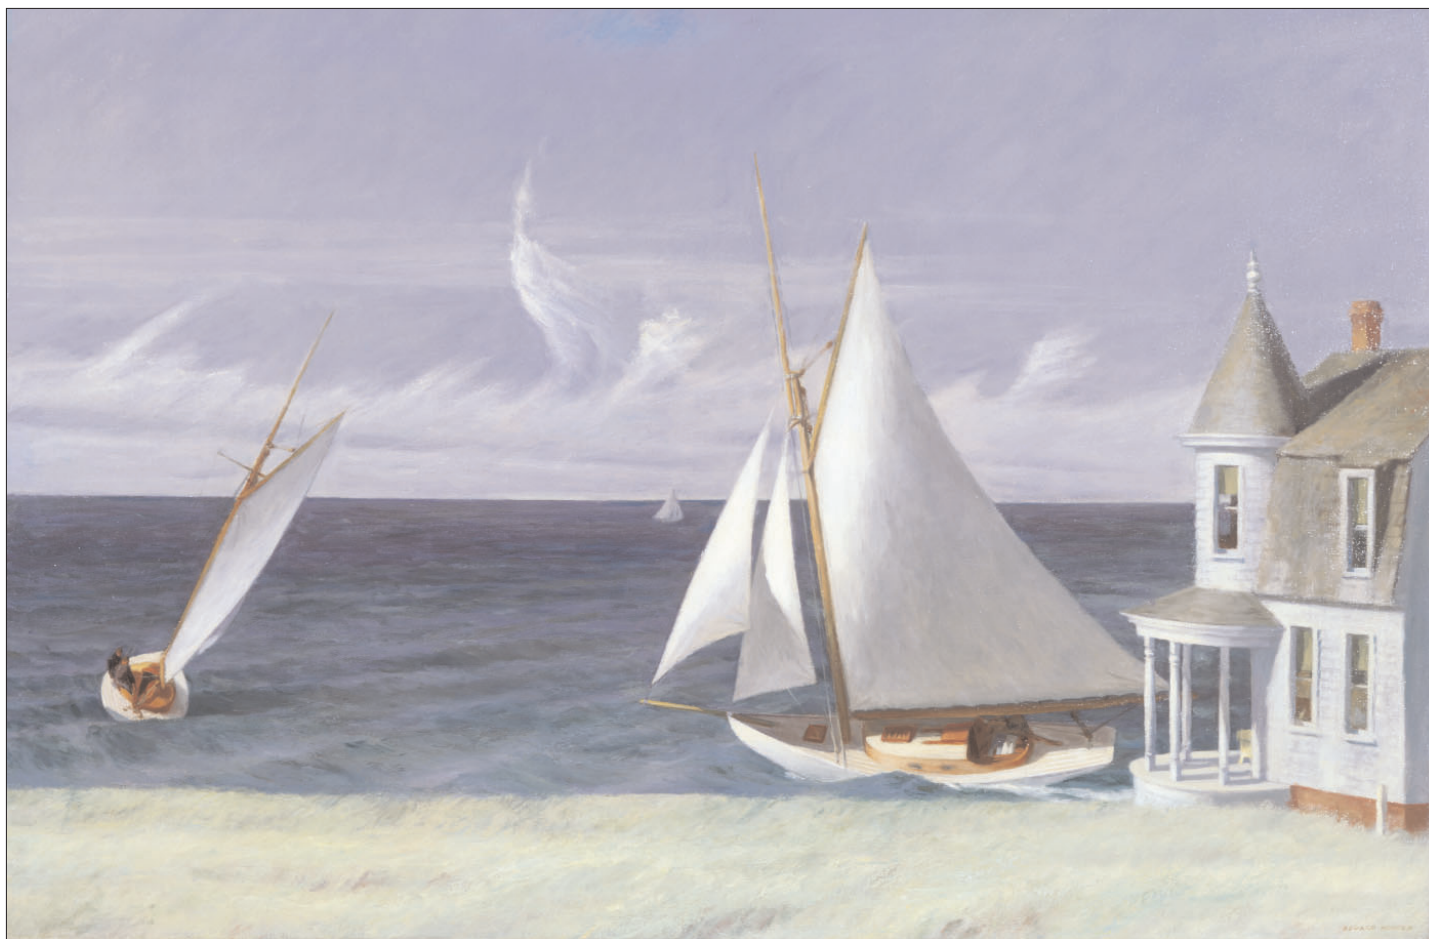

◆ International Variation  
in Treatment of ADHD:  
Social Context and Trends

◆ Seven Studies of Coercion  
Find Negative Effects on  
Patients, Staff, and Care

◆ Elders in Home Health Care:  
Prevalence of Depression  
and Treatment Preferences
