# TAKING ISSUE

## Coercion Is Not Mental Health Care

In this month's issue, Newton-Howes and Mullen report findings of their review of the literature on consumers' experience of coercion in care. What is remarkable is that this is the first systematic review of research on consumers' perception of coercion. It is also remarkable that the literature spans more than 30 years. This raises the question: Why has no one conducted a comparative analysis of consumers' perception of coercion?

One need only consult with the experts—consumers themselves—to understand why. In a nonsystematic review of consumer opinions, adolescent and adult consumers were asked why they thought such an analysis had not been undertaken before. They offered the following explanation: 1) discrimination, 2) discrimination, and 3) discrimination. They also agreed: “Coercion is in the eye of the beholder,” and the orientation of the researcher biases the study. Research findings are inherently flawed—and our understanding of coercion along with them—unless the study and the data analysis are conducted by consumers who have experienced coercion.

However, consumer-experts find hope in new federally funded transformation initiatives. These efforts have helped to promote consumer voice and choice and expand peer roles. Thirty years ago, when the study of consumers' experience of coercion in care was in its infancy, the idea of peer specialists working in inpatient and outpatient settings was unheard of. Not now. Thirty years ago, the possibility of young adults working as peer mentors in inpatient and outpatient services did not exist. It does now. Thirty years ago, “parent partners” working in hospital and community-based care was unknown. Not anymore. These roles and many more are emerging in public and private health care systems and transforming and destigmatizing mental health treatment—making recovery real.

Newton-Howes and Mullen recommend further study “to enable psychiatrists to optimize management of their patients while maximizing their autonomy.” The time has come to shift the research focus from coercion in traditional care to autonomy in peer programming. It is time to study what enables consumers to *self-manage* and what promotes satisfaction and efficacy. Recent research suggests that peer-run and peer-staffed crisis services lead to higher levels of consumer satisfaction and a reduction in psychiatric symptoms. In a service system focused on transformation, studying the facets of care that promote recovery is prudent and necessary.

Ironically, a bill introduced in Congress in response to health care reforms was titled “Coercion Is Not Health Care.” At issue is a perceived lack of choice by Americans about health insurance. The matter may be headed to the Supreme Court for resolution, but for the moment, it appears that consumers and some legislators may have found common ground: coercion is not health care or mental health care.—JANICE L. LEBEL, ED.D., *Massachusetts Department of Mental Health*

*Psychiatric Services*, established in 1950, is published monthly by the American Psychiatric Association for mental health professionals and others concerned with treatment and services for persons with mental illnesses and mental disabilities, in keeping with APA's objectives to improve care and treatment, to promote research and professional education in psychiatric and related fields, and to advance the standards of all psychiatric services and facilities.

### Editor

Howard H. Goldman, M.D., Ph.D.

### Editorial Board

David A. Adler, M.D.  
Benjamin G. Druss, M.D., M.P.H.  
Javier I. Escobar, M.D.  
Stephen M. Goldfinger, M.D.  
Richard K. Harding, M.D.  
Grayson S. Norquist, M.D., M.S.P.H.  
Martha Sajatovic, M.D.  
Bradley D. Stein, M.D., Ph.D.  
Marvin S. Swartz, M.D.  
Marcia Valenstein, M.D.  
Roy C. Wilson, M.D.  
Bonnie T. Zima, M.D., M.P.H.

### Editor Emeritus

John A. Talbott, M.D.

### Book Review Editor

Jeffrey L. Geller, M.D., M.P.H.

### Statistical Consultant

Deborah R. Medoff, Ph.D.

### Contributing Editors

Paul S. Appelbaum, M.D., *Law & Psychiatry*  
José Miguel Caldas de Almeida, M.D., and Marcela Horvitz-Lennon, M.D., M.P.H., *Mental Health Care Reforms in Latin America*  
Francine Cournos, M.D., and Stephen M. Goldfinger, M.D., *Frontline Reports*  
Lisa B. Dixon, M.D., M.P.H., and Brian Hepburn, M.D., *Public-Academic Partnerships*  
Jeffrey L. Geller, M.D., M.P.H., *Personal Accounts*  
William M. Glazer, M.D., *Best Practices*  
Amy M. Kilbourne, Ph.D., M.P.H., and Tami L. Mark, Ph.D., *Datapoints*  
Matt Muijen, M.D., Ph.D., *Mental Health Care Reforms in Europe*  
Fred C. Osher, M.D., *State Mental Health Policy*  
Jules M. Ranz, M.D., and Susan M. Deakins, M.D., *Case Studies in Public-Sector Leadership*  
Steven S. Sharfstein, M.D., Haiden A. Huskamp, Ph.D., and Alison Evans Cuellar, Ph.D., *Economic Grand Rounds*

### Editorial Consultants

Norman Clemens, M.D.  
Julie M. Donohue, Ph.D.  
Robert E. Drake, M.D., Ph.D.  
Marcia Kraft Goin, M.D., Ph.D.  
Shelly F. Greenfield, M.D., M.P.H.  
M. Susan Ridgely, J.D.  
Laura Van Tosh

### Editorial Staff

Constance Grant Gartner, *Managing Editor*  
Demarie S. Jackson, *Associate Editor*  
Kathleen Stearman, *Associate Editor*  
Wendy Lieberman Taylor, *Production Manager*  
Samantha Luck, *Editorial Support Services Manager*

### American Psychiatric Association

Carol A. Bernstein, M.D., *President*  
John M. Oldham, M.D., *President-Elect*  
Jeffrey L. Geller, M.D., M.P.H., *Vice-President*  
Roger Peele, M.D., *Secretary*  
David Fassler, M.D., *Treasurer*  
Bruce A. Hershfield, M.D., *Speaker, APA Assembly*  
James H. Scully, M.D., *Medical Director and CEO*
